# Supplementary material for: Posterior cerebral artery infarction associated with Mycoplasma pneumoniae infection in children
Source: Research Square preprint supplement (doi:10.21203/rs.3.rs-2477973/v1), 2023-01-30
Supplement: Supplementary file 1 [file 84dddba9f88d939a4212728f.docx]

**Table 1** Relevant clinical, laboratory and therapeutic data on patients

**
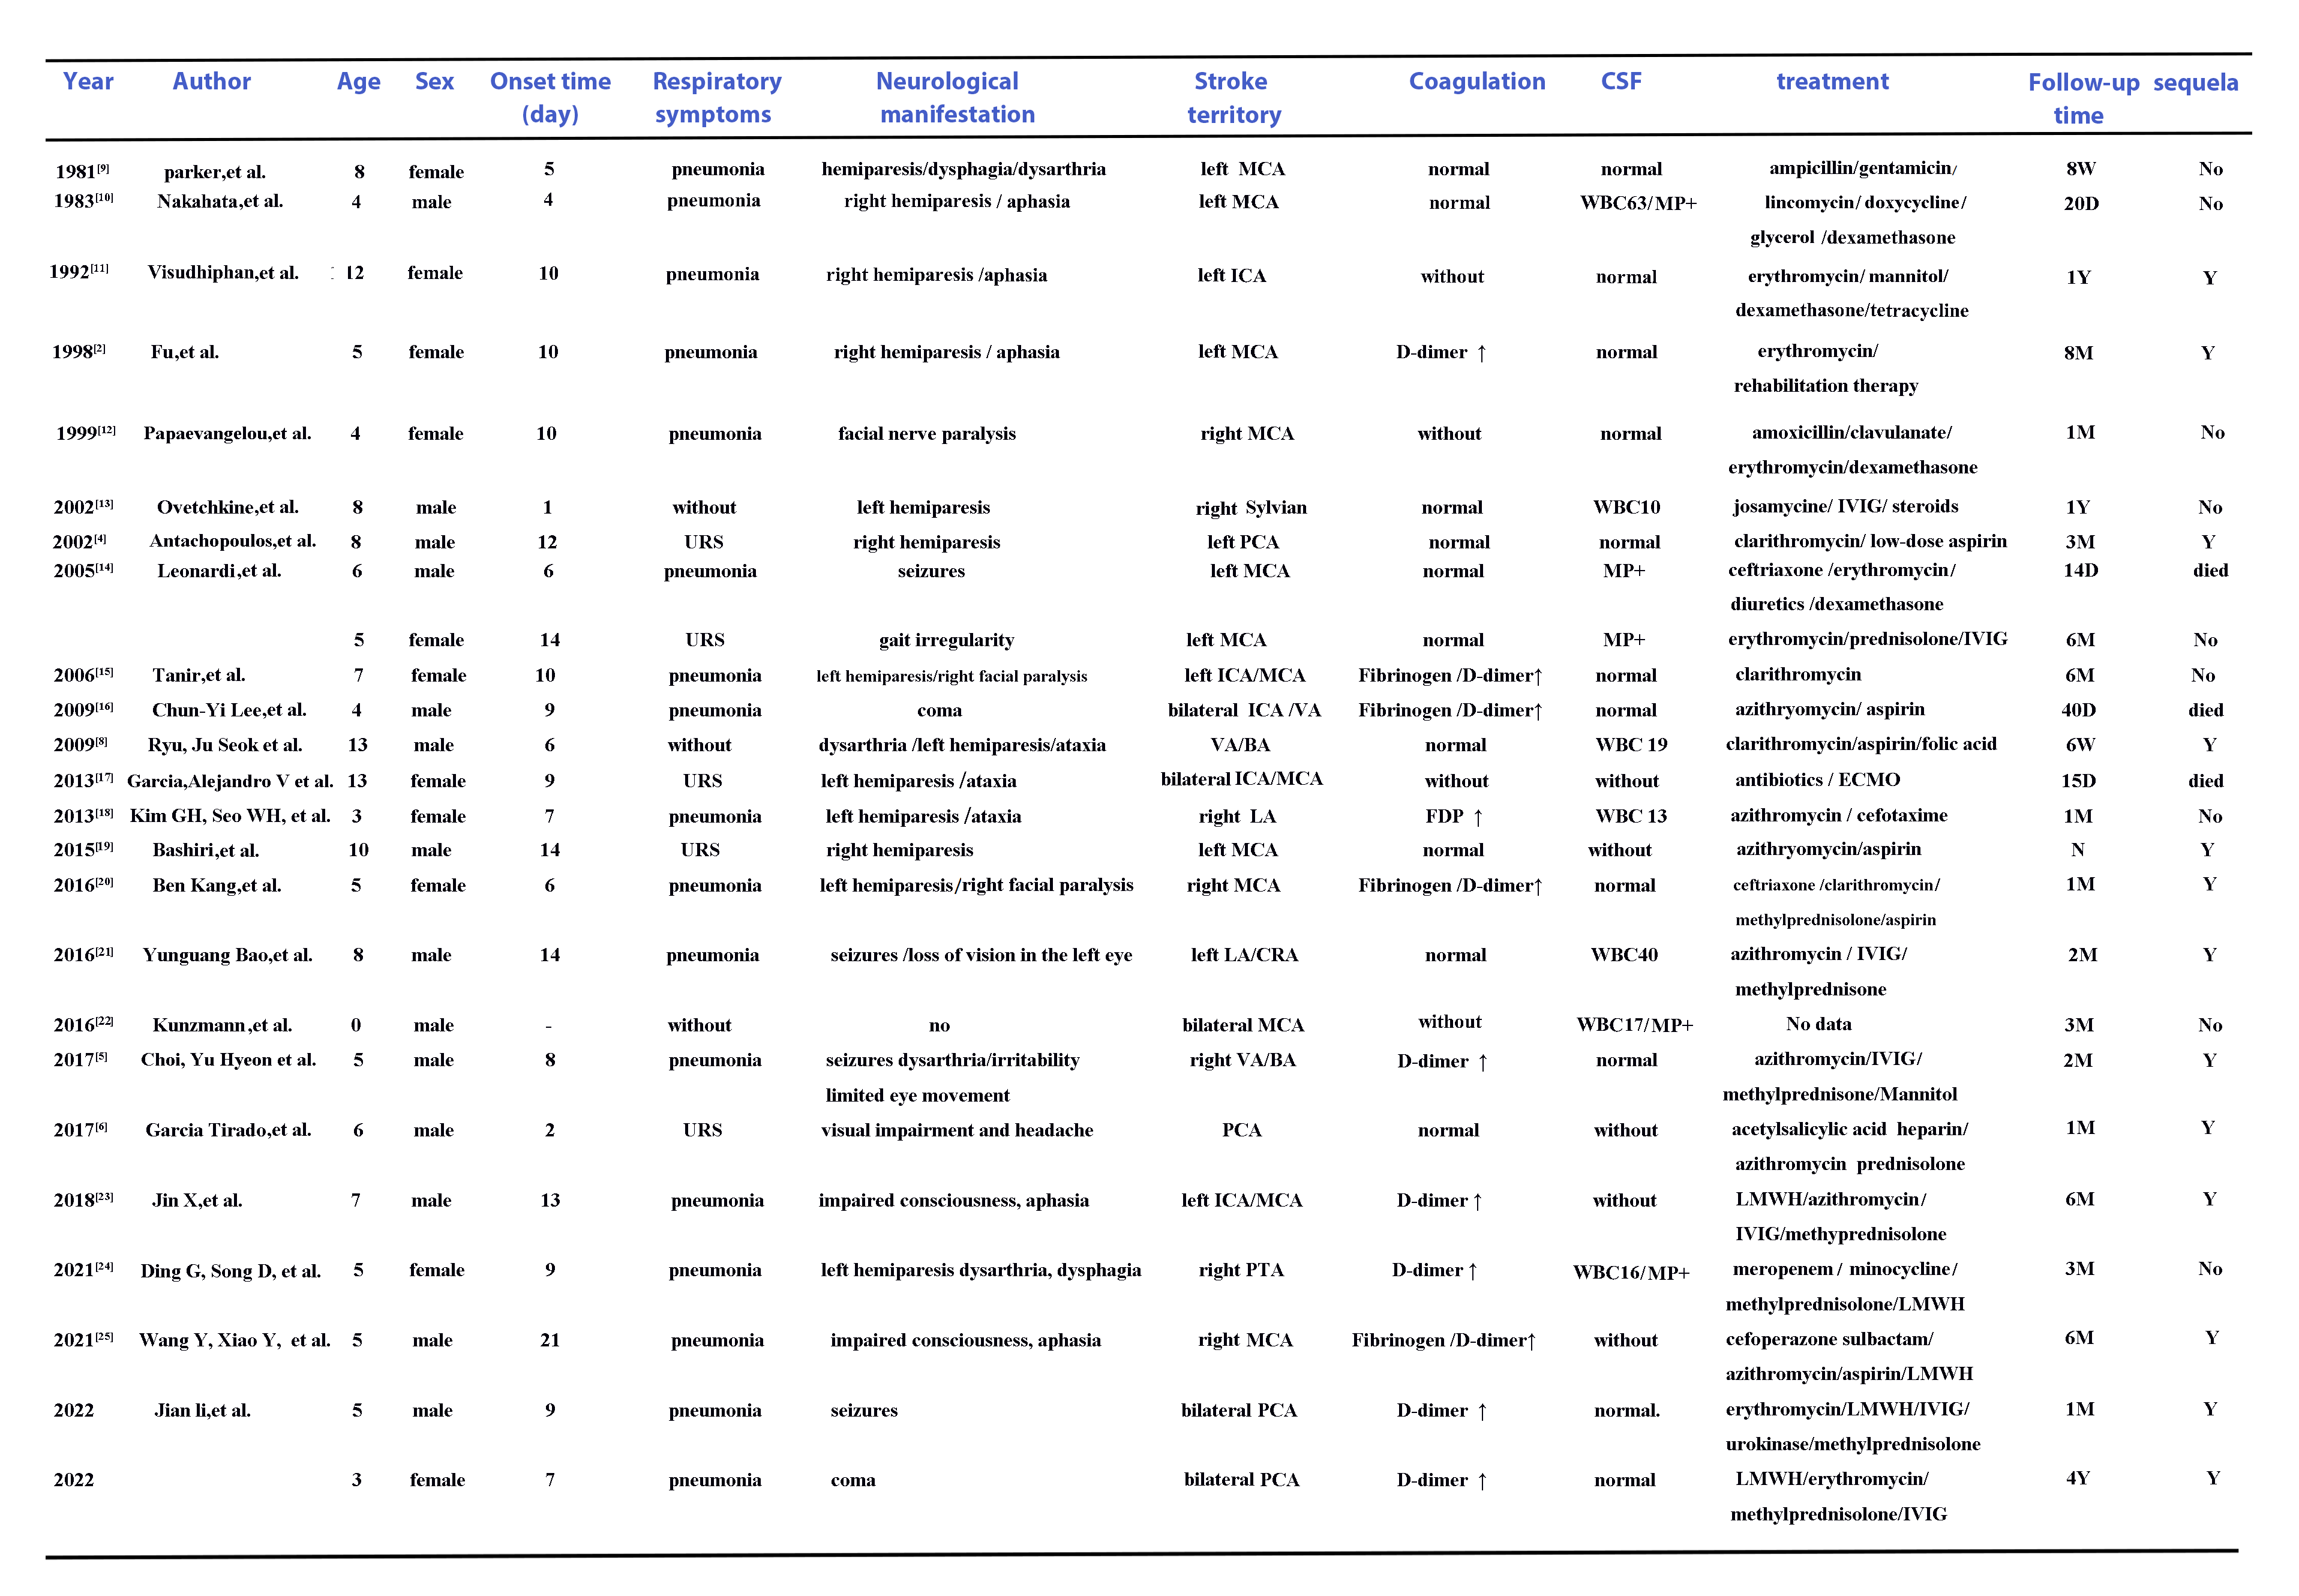
**

**Abbreviations:**

**URS:** Upper respiratory symptoms；**MP:** Mycoplasma; **MCA:**Middle cerebral artery; **ICA:**Internal Carotid Artery; **PCA:**Posterior cerebral arteries; **VA:**Vertebral arteries; **BA:** Basal arteries; **LA:**Lenticular artery; **CRA:**Central retinal artery ;**PTA:**Post Traffic Artery;FDP:Fibrin degradation product; **IGIV:** Intravenous Immunoglobulin; **LMWH:** low molecular weight heparin; **PCR:** Polymerase chain reaction

** Inclusion Criteria for Pediatric Patients with Mycoplasma Pneumoniae Associated Stroke: All patients developed ischemic stroke within 4 weeks of MP infection, and MP infection was demonstrated serologically with assays including ELISA, complement fixation, cold agglutinin assay, or PCR.
